# Supplementary material for: Aztreonam Lysine Increases the Activity of Phages E79 and phiKZ against Pseudomonas aeruginosa PA01
Source: PubMed Central journal article supplement (PMC7827458; doi:10.3390/microorganisms9010152), 2021-01-12
Supplement: microorganisms-09-00152-s001.pdf [file microorganisms-09-00152-s001.pdf]

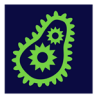

# Supplementary Materials: Aztreonam Lysine Increases the Activity of Phages E79 and phiKZ against *Pseudomonas aeruginosa* PA01

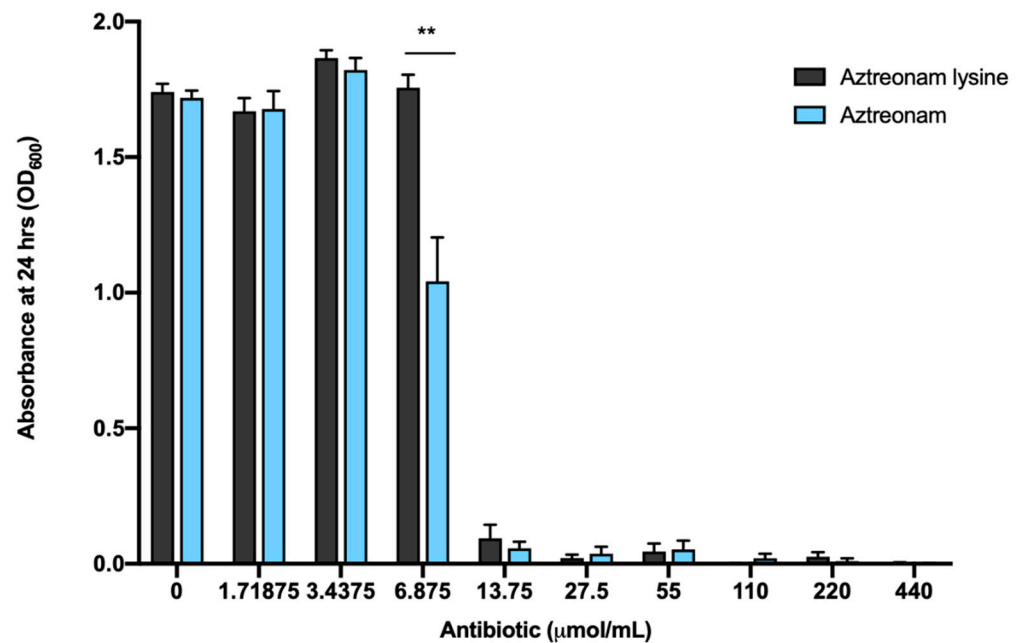

**Figure S1:** MIC of aztreonam lysine (AzLys) versus aztreonam on *P. aeruginosa* PA01. Exponential phase PA01 was diluted 1:100 to approximately 10<sup>5</sup> CFU/mL and grown for 24 h at 37 °C in the presence of either AzLys or Aztreonam antibiotic at varying concentrations. Optical density at 600 nm (OD<sub>600</sub>) was measured to obtain culture growth. Statistical analysis was performed using an unpaired t-test (\*\*;P < 0.01). Error bars represent standard error of the mean (SEM).

**Citation:** Davis, C.M.; McCutcheon, J.G.; Dennis, J.J. Aztreonam Lysine Increases the Activity of Phages E79 and phiKZ against *Pseudomonas aeruginosa* PA01. *Microorganisms* **2021**, *9*, 152. <https://doi.org/10.3390/microorganisms9010152>

Received: 17 December 2020

Accepted: 8 January 2021

Published: 12 January 2021

**Publisher’s Note:** MDPI stays neutral with regard to jurisdictional claims in published maps and institutional affiliations.

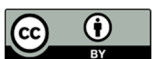

**Copyright:** © 2021 by the authors. Submitted for possible open access publication under the terms and conditions of the Creative Commons Attribution (CC BY) license (<http://creativecommons.org/licenses/by/4.0/>).

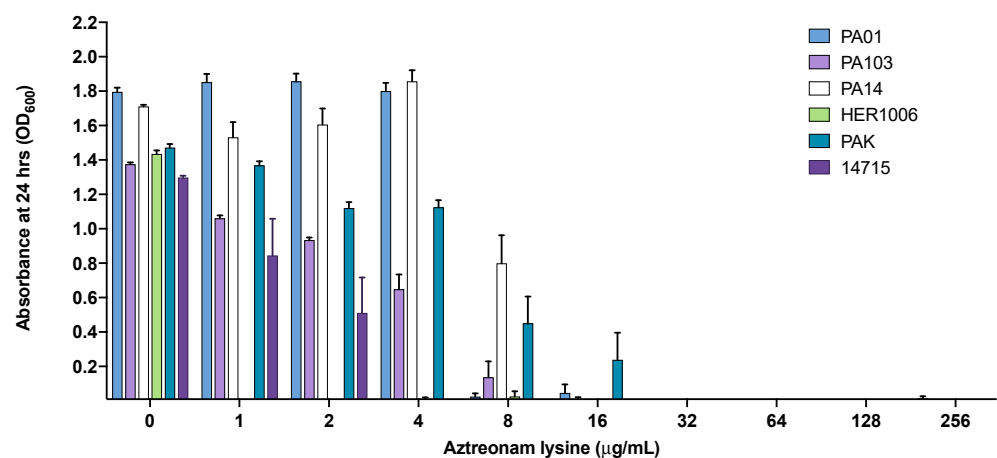

**Figure S2:** MIC of aztreonam lysine (AzLys) on different *P. aeruginosa* strains. Each strain was grown to exponential phase and diluted 1:100 to approximately 10<sup>5</sup> CFU/mL and grown for 24 h at 37 °C in the presence of AzLys at varying concentrations. Optical density at 600 nm (OD<sub>600</sub>) was measured to obtain culture growth. Error bars represent standard error of the mean (SEM).

**Supplementary Table 1.** Aztreonam Lysine minimal inhibitory concentrations for *P. aeruginosa* strains

| <i>P. aeruginosa</i> strain | PA01 | PA103 | PA14 | HER1006 | PAK | 14715 |
|-----------------------------|------|-------|------|---------|-----|-------|
| MIC (mg/mL)                 | 8    | 16    | 16   | <1      | 32  | 4     |
